# Supplementary material
Source: PubMed Central journal article supplement (PMC3056319)
Supplement: NIHMS268111-supplement-1_si_001.pdf [file NIHMS268111-supplement-1_si_001.pdf]

## Supporting information

# A chemotype that inhibits three unrelated pathogenic targets: the botulinum neurotoxin serotype A light chain, *P. falciparum* malaria, and the Ebola filovirus

Igor Opsenica,<sup>¶</sup> James C. Burnett,<sup>§,\*</sup> Rick Gussio,<sup>†</sup> Dejan Opsenica,<sup>‡</sup> Nina Todorović,<sup>‡</sup> Charlotte A. Lanteri,<sup>∇</sup> Richard J. Sciotti,<sup>∇</sup> Montip Gettayacamin,<sup>◇</sup> Nicoletta Basilico,<sup>∇</sup> Donatella Taramelli,<sup>∇</sup> Jonathan E. Nuss,<sup>#</sup> Laura Wanner,<sup>#</sup> Rekha G. Panchal,<sup>#</sup> Bogdan A. Šolaja,<sup>¶,\*</sup> Sina Bavari<sup>#,\*</sup>

<sup>¶</sup>Faculty of Chemistry, University of Belgrade, Studentski trg 16, P.O. Box 51, 11158, Belgrade, Serbia; <sup>§</sup>Target Structure-Based Drug Discovery Group, SAIC-Frederick, Inc., National Cancer Institute at Frederick, P.O. Box B, Frederick, MD 21702, USA; <sup>†</sup>Developmental Therapeutics Program, National Cancer Institute at Frederick, P.O. Box B, F.V.C. 310, Frederick, MD 21702, USA; <sup>‡</sup>Institute of Chemistry, Technology, and Metallurgy, Belgrade, Serbia; <sup>∇</sup>Division of Experimental Therapeutics, Walter Reed Army Institute of Research, Silver Spring, MD 20910, USA; <sup>◇</sup>United States Army Medical Component, Armed Forces Research Institute of Medical Science, Department of Veterinary Medicine, Bangkok, Thailand; <sup>∇</sup>Dipartimento di Sanità Pubblica-Microbiologia-Virologia, Università di Milano, Via Pascal 36, 20133 Milano, Italy; <sup>#</sup>United States Army Medical Research Institute of Infectious Diseases, 1425 Porter Street, Frederick, MD 21702; USA

## Table of contents

|                           |          |
|---------------------------|----------|
| Figure S1                 | S2       |
| Figure S2                 | S3       |
| Table S1                  | S3       |
| Table S2                  | S4       |
| Combustion analyses       | S4       |
| HPLC purity chromatograms | S5 – S44 |

Plot of the BoNT/A LC inhibition kinetics for **7**.

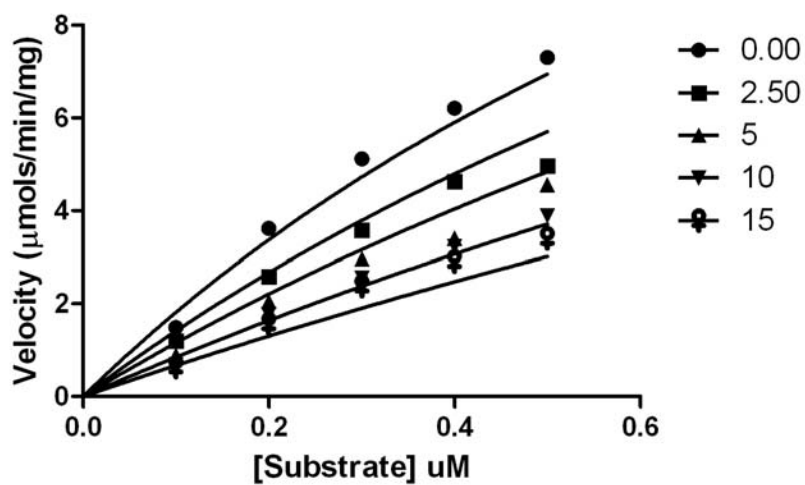

Plot of the BoNT/A LC inhibition kinetics for **8**.

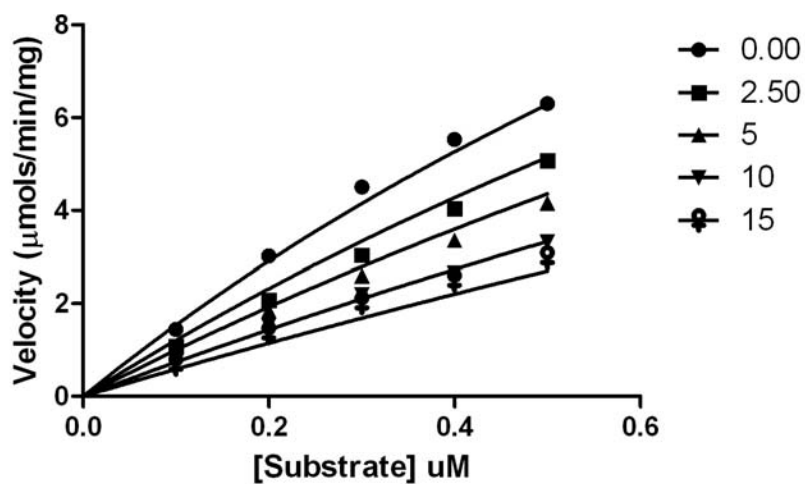

**Figure S1:** BoNT/A LC inhibition. Plots of the kinetics data from determination of the  $K_i$  values for **7** and **8** indicate that 1,7-DAAC-based SMNPIs are competitive inhibitors.

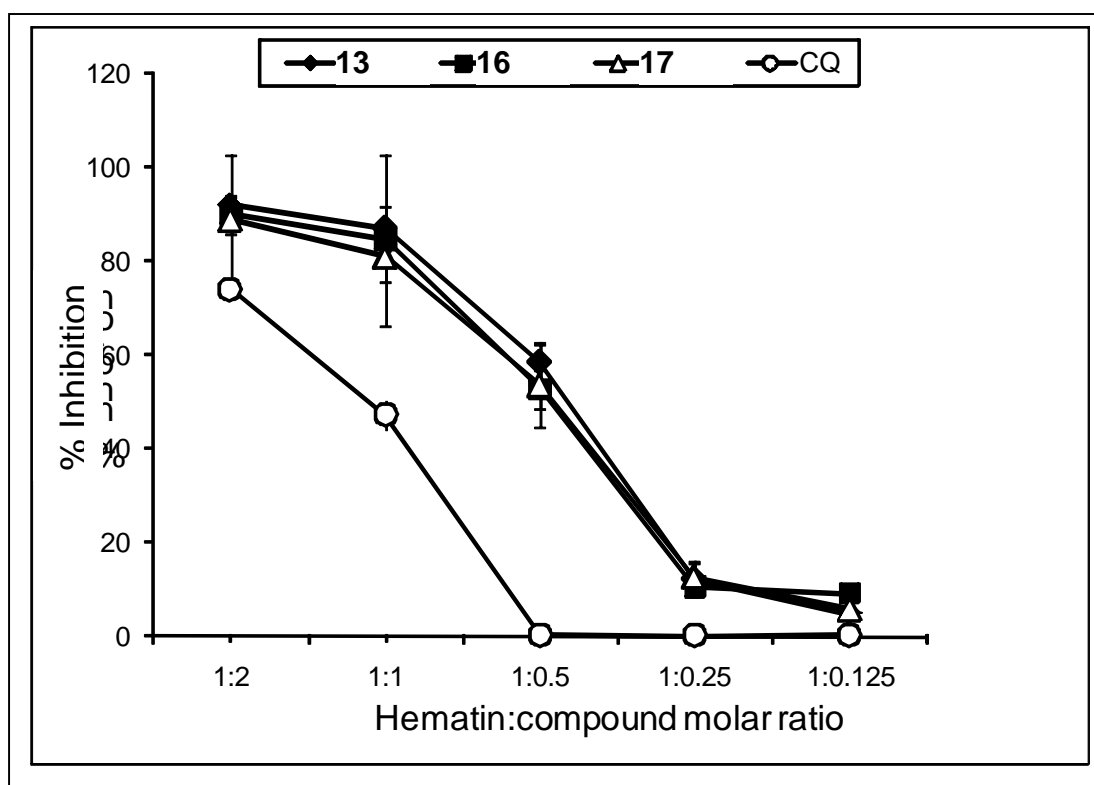

**Figure S2:** Plots of the dose-dependent inhibition of  $\beta$ -hematin formation by **13**, **16**, **17**, and **CQ**.

**Table S1:** The in vitro cytotoxicities of 1,7-DAAC SMNPIs versus the RAW 264.7 (mouse macrophage) cell line, and corresponding Selectivity Indices.

| Compound  | In vitro cytotoxicity (nM) |                  | SI (IC <sub>50</sub> )* |         |          | SI (IC <sub>90</sub> )* |         |          |
|-----------|----------------------------|------------------|-------------------------|---------|----------|-------------------------|---------|----------|
|           | IC <sub>50</sub>           | IC <sub>90</sub> | D6                      | W2      | TM91C235 | D6                      | W2      | TM91C235 |
| <b>1</b>  | 1155                       | 1842             | 38.48                   | 133.53  | 17.37    | 37.19                   | 39.42   | 6.55     |
| <b>7</b>  | 2148                       | 2571             | 3.03                    | 1.26    | 1.06     | 2.54                    | 0.79    | 0.84     |
| <b>8</b>  | 5260                       | 9657             | 19.46                   | 6.04    | 5.15     | 27.20                   | 5.41    | 5.48     |
| <b>9</b>  | 997                        | 1892             | 9.64                    | 2.83    | 18.19    | 9.00                    | 2.67    | 2.71     |
| <b>10</b> | 2559                       | 5348             | 163.93                  | 278.46  | 167.58   | 256.87                  | 171.25  | 205.53   |
| <b>11</b> | 9348                       | 10717            | 1555.41                 | 2686.21 | 2815.66  | 1189.46                 | 1058.99 | 2827.70  |
| <b>12</b> | 444                        | 444              | 29.92                   | 57.29   | 12.95    | 11.27                   | 17.52   | 4.66     |
| <b>13</b> | 4945                       | 13645            | 295.05                  | 609.74  | 190.93   | 422.71                  | 487.32  | 338.75   |
| <b>14</b> | 1474                       | 2109             | 159.18                  | 211.18  | 59.34    | 120.00                  | 93.73   | 51.16    |
| <b>15</b> | 1866                       | 2108             | 212.29                  | 339.27  | 176.87   | 159.58                  | 137.15  | 141.19   |
| <b>16</b> | 7481                       | 11029            | 1430.40                 | 3740.50 | 929.32   | 1302.12                 | 1728.68 | 635.31   |
| <b>17</b> | 10174                      | 29917            | 1715.68                 | 1662.42 | 1033.94  | 2374.36                 | 2601.48 | 1815.35  |

\* SI (Selectivity Index) = in vitro cytotoxicity (nM) / in vitro P.f. (nM)

**Table S2.** Antiviral inhibition provided by select 1,7-DAAC SMNPIs (primary screen data, % inhibition at 20 $\mu$ M conc. SMNPI)

| Compound  | Ebola-GFP |
|-----------|-----------|
| <b>7</b>  | 65        |
| <b>8</b>  | 98        |
| <b>9</b>  | 100       |
| <b>11</b> | 97        |
| <b>13</b> | 100       |
| <b>14</b> | 100       |
| <b>16</b> | 96        |
| <b>17</b> | 53        |

#### Combustion analyses

| Compound                                                                                                      | Calculated               | Found                    |
|---------------------------------------------------------------------------------------------------------------|--------------------------|--------------------------|
| <b>7</b> (C <sub>24</sub> H <sub>30</sub> N <sub>6</sub> × 4HCl × 4H <sub>2</sub> O (620.44))                 | C 46.46; H 6.82; N 13.55 | C 45.99; H 6.70; N 13.54 |
| <b>8</b> (C <sub>22</sub> H <sub>26</sub> N <sub>6</sub> × 4HCl × 2H <sub>2</sub> O (556.36))                 | C 47.49; H 6.16; N 15.11 | C 47.46; H 5.76; N 15.02 |
| <b>9</b> (C <sub>28</sub> H <sub>38</sub> N <sub>6</sub> × 4HCl × 6H <sub>2</sub> O (712.58))                 | C 47.19; H 7.64; N 11.79 | C 47.12; H 8.07; N 12.02 |
| <b>10</b> (C <sub>26</sub> H <sub>34</sub> N <sub>6</sub> × 4HCl × 4H <sub>2</sub> O (648.49))                | C 48.15; H 7.15; N 12.96 | C 48.08; H 6.68; N 12.67 |
| <b>11</b> (C <sub>32</sub> H <sub>46</sub> N <sub>6</sub> × 4HCl × 2H <sub>2</sub> O (696.62))                | C 55.17; H 7.81; N 12.06 | C 54.78; H 7.44; N 11.70 |
| <b>11</b> (C <sub>30</sub> H <sub>42</sub> N <sub>6</sub> × 4HCl × 4H <sub>2</sub> O (704.60))                | C 51.14; H 7.72; N 11.93 | C 51.62; H 7.15; N 11.81 |
| <b>12</b> (C <sub>32</sub> H <sub>42</sub> N <sub>6</sub> × 4HCl × 7H <sub>2</sub> O (782.67))                | C 49.11; H 7.73; N 10.74 | C 48.86; H 7.46; N 10.78 |
| <b>13</b> (C <sub>30</sub> H <sub>38</sub> N <sub>6</sub> × 4HCl × 11H <sub>2</sub> O (826.68))               | C 43.59; H 7.80; N 10.17 | C 44.02; H 7.57; N 10.26 |
| <b>14</b> (C <sub>34</sub> H <sub>46</sub> N <sub>6</sub> × 4HCl × 4H <sub>2</sub> O (756.67))                | C 53.97; H 7.73; N 11.11 | C 53.47; H 8.07; N 11.09 |
| <b>15</b> (C <sub>32</sub> H <sub>42</sub> N <sub>6</sub> × 4HCl × 3H <sub>2</sub> O (710.61))                | C 54.09; H 7.38; N 11.83 | C 53.45; H 7.79; N 11.79 |
| <b>16</b> (C <sub>32</sub> H <sub>42</sub> N <sub>6</sub> O <sub>2</sub> × 4HCl × 6H <sub>2</sub> O (796.65)) | C 48.24; H 7.34; N 10.55 | C 48.43; H 7.26; N 10.60 |
| <b>17</b> (C <sub>30</sub> H <sub>38</sub> N <sub>6</sub> O <sub>2</sub> × 4HCl × 4H <sub>2</sub> O (732.57)) | C 49.19; H 6.88; N 11.47 | C 49.54; H 6.08; N 11.52 |

**HPLC analyses for purity.**

Compounds were analyzed for purity (HPLC) using a Waters 1525 HPLC dual pump system equipped with an Alltech, Select<sup>TM</sup> degasser system and dual  $\lambda$  2487 UV-VIS detector.

Octadecylsilica was used as the stationary phase (Symmetry C18 analytical column, 4.6  $\times$  150 mm, 5  $\mu$ m, Ser. No. 021336278136 37). Eluent was made from solvents 0.2 % formic acid in water (A) and methanol (B).

Compound **1** was eluted using gradient protocol 0-1.5 min 75% A, 3-9 min 75% $\rightarrow$ 25% A, 9-11 min 25% A, 11-12 min 25%  $\rightarrow$  75% A, flow 1.00 mL/min, wavelength 385 nm.

Compounds **6, 7, 8, 12, 14, 16**, were eluted using gradient protocol 0-1.5 min 60% A, 1.5-12 min 60% $\rightarrow$ 40% A, 12-15 min 40 % A, 15-16 min 40%  $\rightarrow$  60% A, flow 1.00 mL/min, wavelength 385 nm.

Compound **9** was eluted using gradient protocol 0-1.5 min 90% A, 1.5-12 min 90% $\rightarrow$ 10% A, 12-15 min 10 % A, 15-16 min 10%  $\rightarrow$  90% A, flow 1.00 mL/min, wavelength 363 nm.

Compound **10** was eluted using gradient protocol 0-1.5 min 80% A, 1.5-12 min 80% $\rightarrow$ 20% A, 12-15 min 20 % A, 15-16 min 20%  $\rightarrow$  80% A, flow 1.00 mL/min, wavelength 385 nm.

Compound **11** was eluted using gradient protocol 0-3 min 90% A, 3-9 min 90% $\rightarrow$ 10% A, 9-11 min 10 % A, 11-12 min 10%  $\rightarrow$  90% A, flow 1.00 mL/min, wavelength 385 nm.

Compound **13** was eluted using gradient protocol 0-1.5 min 55% A, 1.5-12 min 55% $\rightarrow$ 45% A, 12-15 min 45 % A, 15-16 min 45%  $\rightarrow$  55% A, flow 1.00 mL/min, wavelength 385 nm.

Compound **15** was eluted using gradient protocol 0-3 min 85% A, 3-9 min 85% $\rightarrow$ 15% A, 9-11 min 15 % A, 11-12 min 15%  $\rightarrow$  85% A, flow 1.00 mL/min, wavelength 360 nm.

Compound **17** was eluted using gradient protocol 0-1.5 min 95% A, 1.5-12 min 95% $\rightarrow$ 5% A, 12-15 min 5 % A, 15-16 min 5%  $\rightarrow$  95% A, flow 1.00 mL/min, wavelength 385nm.

For data processing, Empower software was used. All compounds were > 95% pure.

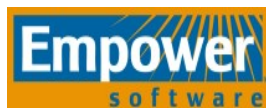

# Multi Sample Summary

Reported by User: System

Project Name: Hrizeni

## SAMPLE INFORMATION

|                   |                              |                     |                     |
|-------------------|------------------------------|---------------------|---------------------|
| Sample Name:      | 80 20 385 <b>Compound 16</b> | Acquired By:        | System              |
| Sample Type:      | Unknown                      | Date Acquired:      | 17.11.2010 10:49:33 |
| Vial:             | 2                            | Acq. Method Set:    | 60 40 385 BDI 17_MS |
| Injection #:      | 1                            | Date Processed:     | 17.11.2010 15:43:32 |
| Injection Volume: | 10,00 ul                     | Processing Method:  | <b>16</b>           |
| Run Time:         | 16,0 Minutes                 | Channel Name:       | 2487Channel 1       |
| Sample Set Name:  |                              | Proc. Chnl. Descr.: |                     |

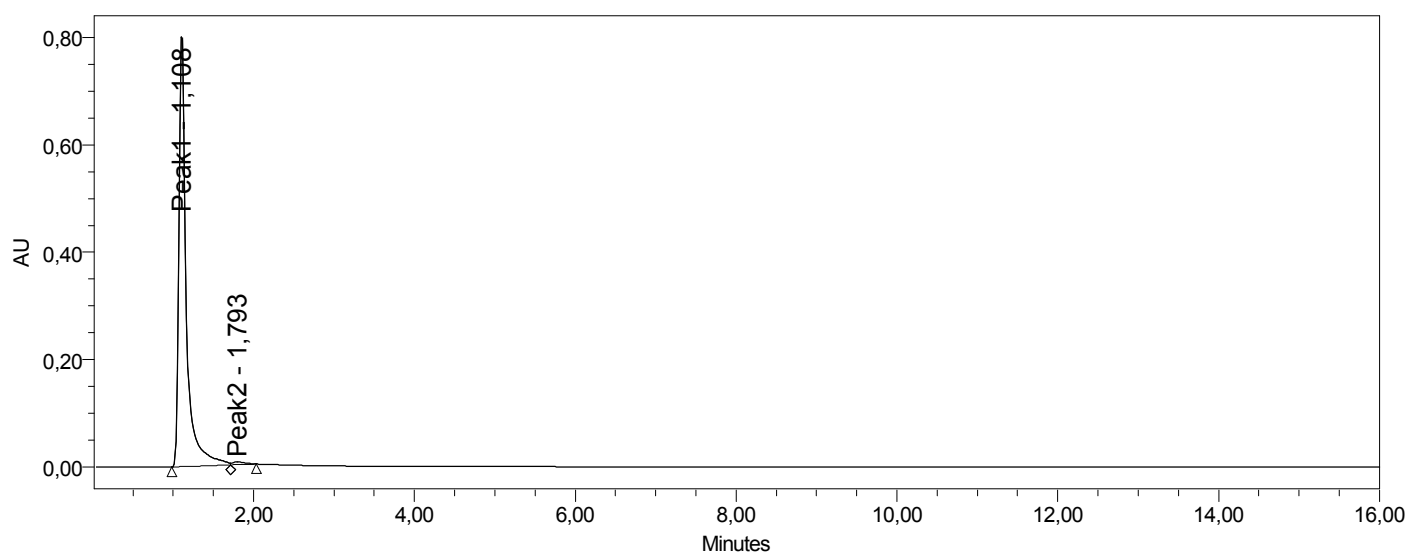

|   | Peak Name | RT    | Area    | % Area | Height |
|---|-----------|-------|---------|--------|--------|
| 1 | Peak1     | 1,108 | 5300067 | 98,93  | 804835 |
| 2 | Peak2     | 1,793 | 57090   | 1,07   | 5681   |



Reported by User: System

Project Name: Hrizeni

## Instrument Method: 60 40 385 BDI 17\_IM

Stored: 16.11.2010 14:47:14

### W2487 Instrument Setup

Type W2487  
 Instrument Status On  
 Dual Wavelength False  
 Pulse Period Seconds 1,0  
 Pulse Repeat Period Seconds 1,0

### W2487 Channel Information

Channel Name 2487Channel 1  
 Description  
 Use Channels On  
 Wavelength 385  
 Output Mode Absorbance A (Ch1)  
 Data Mode Absorbance A (Ch1)  
 Sampling Rate 1  
 Filter Type Hamming  
 Aups 2,0000  
 Time Constant 1,0  
 AU Offset 0,000  
 Voltage Offset 0  
 Polarity +  
 AutoZero Wavelength True  
 AutoZero Keypad True  
 AutoZeroEvent Input True  
 AutoZero Inject True  
 Chart Mark Enable True  
 Ratio AuMinimum 0,1000  
 Minimum Ratio 0,00  
 Maximum Ratio 2,00

### PCM/15xx Instrument Setup

|                   |          |            |         |
|-------------------|----------|------------|---------|
| Type              | PCM/15xx | Low Limit  | 0,0     |
| Instrument Status | On       | Total Flow | 1,00    |
| Pump Mode         | Gradient | Use Events | On      |
| Flow A            | 0,60     | Solvent A  | 2%HCOOH |
| Flow B            | 0,40     | Solvent B  | MeOH    |
| Flow C            | 0,00     | Solvent C  |         |
| High Limit        | 4000,0   |            |         |

### PCM/15xx Gradient Table

|   | Time | Flow | %A   | %B   | %C  | Curve |
|---|------|------|------|------|-----|-------|
| 1 |      | 1,00 | 60,0 | 40,0 | 0,0 |       |
| 2 | 1,50 | 1,00 | 60,0 | 40,0 | 0,0 | 6     |

|   | Time  | Flow | %A   | %B   | %C  | Curve |
|---|-------|------|------|------|-----|-------|
| 3 | 12,00 | 1,00 | 40,0 | 60,0 | 0,0 | 6     |
| 4 | 15,00 | 1,00 | 40,0 | 60,0 | 0,0 | 6     |

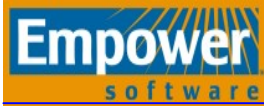

## Multi Sample Summary

Reported by User: System

Project Name: Hrizeni

### PCM/15xx Gradient Table

|   | Time  | Flow | %A   | %B   | %C  | Curve |
|---|-------|------|------|------|-----|-------|
| 5 | 16,00 | 1,00 | 60,0 | 40,0 | 0,0 | 6     |

### Revision History

This method contains 1 items in the revision history.

### Method Version Summaries

|   | Name                | Type       | Comments | Date                | Modified User | Locked | Method Id |
|---|---------------------|------------|----------|---------------------|---------------|--------|-----------|
| 1 | 60 40 385 BDI 17_IM | Instrument |          | 16.11.2010 14:47:14 | System        | No     | 1293      |

### Method Version Summaries

|   | Method Version |
|---|----------------|
| 1 | 1              |



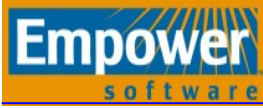

# Multi Sample Summary

Reported by User: System

Project Name: Hrizeni

## SAMPLE INFORMATION

|                   |                             |                     |                     |
|-------------------|-----------------------------|---------------------|---------------------|
| Sample Name:      | 95 5 385 <b>Compound 17</b> | Acquired By:        | System              |
| Sample Type:      | Unknown                     | Date Acquired:      | 16.11.2010 12:36:01 |
| Vial:             | 7                           | Acq. Method Set:    | 95 5 385 BG11_MS    |
| Injection #:      | 1                           | Date Processed:     | 17.11.2010 15:38:52 |
| Injection Volume: | 10,00 ul                    | Processing Method:  | <b>17</b>           |
| Run Time:         | 13,0 Minutes                | Channel Name:       | 2487Channel 1       |
| Sample Set Name:  |                             | Proc. Chnl. Descr.: |                     |

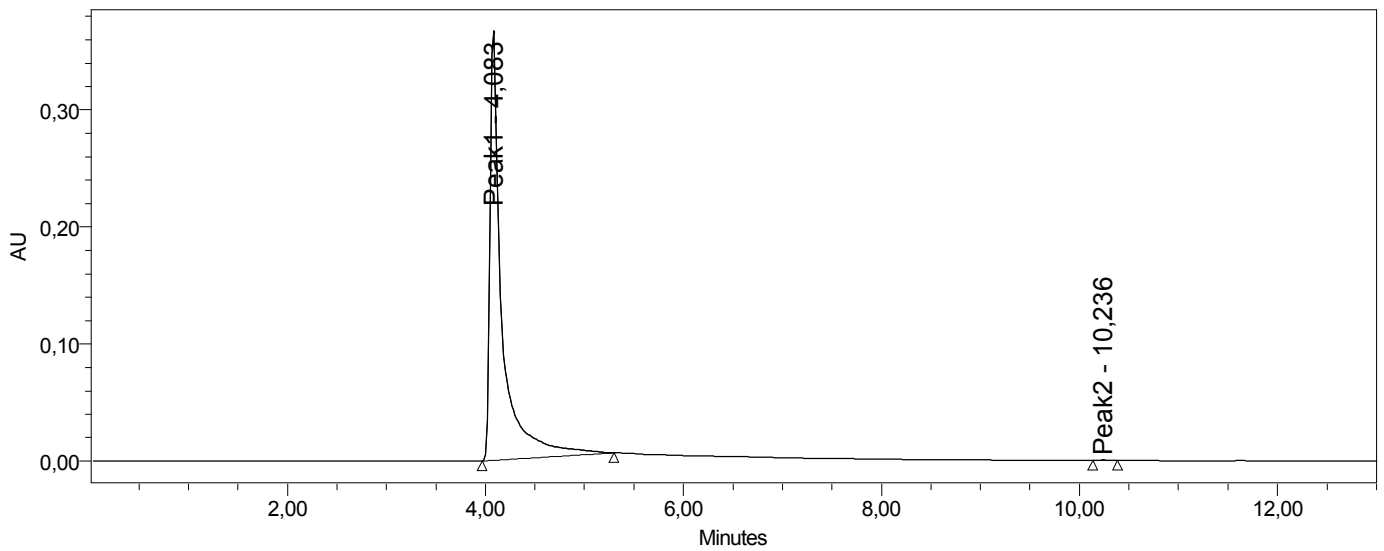

|   | Peak Name | RT     | Area    | % Area | Height |
|---|-----------|--------|---------|--------|--------|
| 1 | Peak1     | 4,083  | 3129992 | 99,90  | 363680 |
| 2 | Peak2     | 10,236 | 3235    | 0,10   | 680    |



Reported by User: System

Project Name: Hrizeni

## Instrument Method: 95 5 385 BG11\_IM

Stored: 10.11.2010 11:57:49

### W2487 Instrument Setup

Type W2487  
 Instrument Status On  
 Dual Wavelength False  
 Pulse Period Seconds 1,0  
 Pulse Repeat Period Seconds 1,0

### W2487 Channel Information

Channel Name 2487Channel 1  
 Description  
 Use Channels On  
 Wavelength 385  
 Output Mode Absorbance A (Ch1)  
 Data Mode Absorbance A (Ch1)  
 Sampling Rate 1  
 Filter Type Hamming  
 Aups 2,0000  
 Time Constant 1,0  
 AU Offset 0,000  
 Voltage Offset 0  
 Polarity +  
 AutoZero Wavelength True  
 AutoZero Keypad True  
 AutoZeroEvent Input True  
 AutoZero Inject True  
 Chart Mark Enable True  
 Ratio AuMinimum 0,1000  
 Minimum Ratio 0,00  
 Maximum Ratio 2,00

### PCM/15xx Instrument Setup

|                   |          |            |         |
|-------------------|----------|------------|---------|
| Type              | PCM/15xx | Low Limit  | 0,0     |
| Instrument Status | On       | Total Flow | 1,00    |
| Pump Mode         | Gradient | Use Events | On      |
| Flow A            | 0,95     | Solvent A  | 2%HCOOH |
| Flow B            | 0,05     | Solvent B  | MeOH    |
| Flow C            | 0,00     | Solvent C  |         |
| High Limit        | 4000,0   |            |         |

### PCM/15xx Gradient Table

|   | Time | Flow | %A   | %B  | %C  | Curve |
|---|------|------|------|-----|-----|-------|
| 1 |      | 1,00 | 95,0 | 5,0 | 0,0 |       |
| 2 | 1,50 | 1,00 | 95,0 | 5,0 | 0,0 | 6     |

|   | Time  | Flow | %A  | %B   | %C  | Curve |
|---|-------|------|-----|------|-----|-------|
| 3 | 12,00 | 1,00 | 5,0 | 95,0 | 0,0 | 6     |
| 4 | 15,00 | 1,00 | 5,0 | 95,0 | 0,0 | 6     |



## Multi Sample Summary

Reported by User: System

Project Name: Hrizeni

### PCM/15xx Gradient Table

|   | Time  | Flow | %A   | %B  | %C  | Curve |
|---|-------|------|------|-----|-----|-------|
| 5 | 16,00 | 1,00 | 95,0 | 5,0 | 0,0 | 6     |

### Revision History

This method contains 1 items in the revision history.

### Method Version Summaries

|   | Name             | Type       | Comments | Date                | Modified User | Locked | Method Id |
|---|------------------|------------|----------|---------------------|---------------|--------|-----------|
| 1 | 95 5 385 BG11_IM | Instrument |          | 10.11.2010 11:57:49 | System        | No     | 1107      |

### Method Version Summaries

|   | Method Version |
|---|----------------|
| 1 | 1              |



# Multi Sample Summary

Reported by User: System

Project Name: Hrizeni

## SAMPLE INFORMATION

|                   |                              |                     |                     |
|-------------------|------------------------------|---------------------|---------------------|
| Sample Name:      | 55 45 385 <b>Compound 13</b> | Acquired By:        | System              |
| Sample Type:      | Unknown                      | Date Acquired:      | 16.11.2010 15:33:42 |
| Vial:             | 14                           | Acq. Method Set:    | 55 45 385 BDI 17_MS |
| Injection #:      | 1                            | Date Processed:     | 17.11.2010 15:40:53 |
| Injection Volume: | 10,00 ul                     | Processing Method:  | <b>13</b>           |
| Run Time:         | 15,0 Minutes                 | Channel Name:       | 2487Channel 1       |
| Sample Set Name:  |                              | Proc. Chnl. Descr.: |                     |

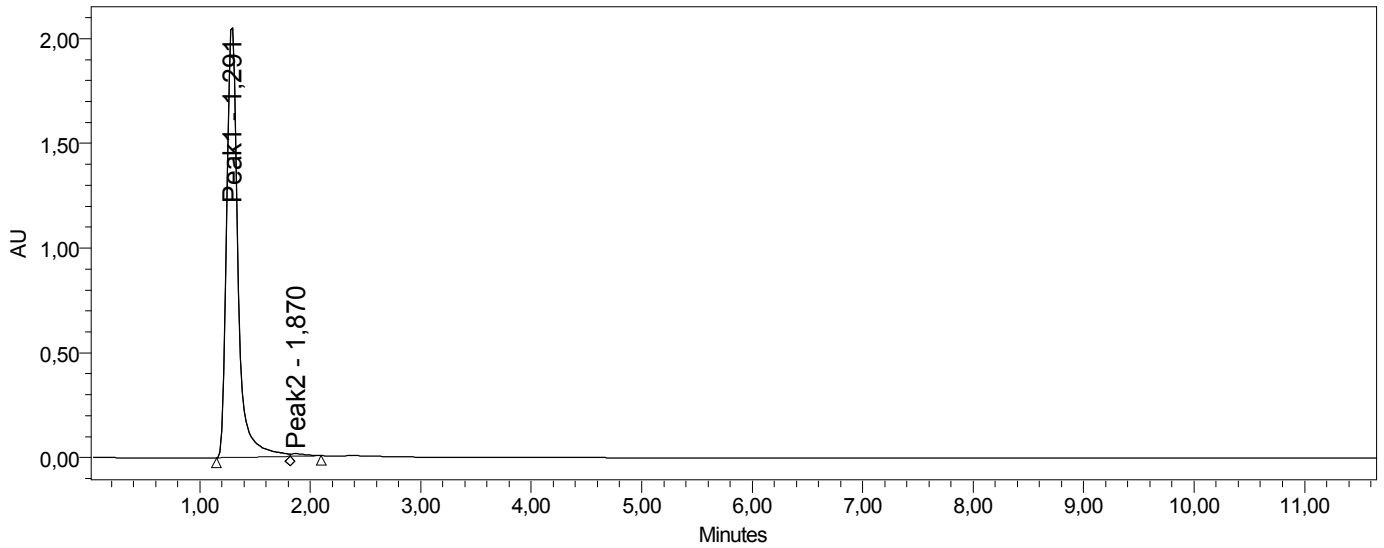

|   | Peak Name | RT    | Area     | % Area | Height  |
|---|-----------|-------|----------|--------|---------|
| 1 | Peak1     | 1,291 | 14857040 | 99,26  | 2079380 |
| 2 | Peak2     | 1,870 | 111135   | 0,74   | 12538   |

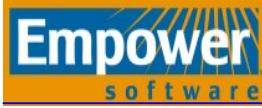

Reported by User: System

Project Name: Hrizeni

## Instrument Method: 55 45 385 BDI 17\_IM

Stored: 16.11.2010 15:14:58

### W2487 Instrument Setup

Type W2487  
 Instrument Status On  
 Dual Wavelength False  
 Pulse Period Seconds 1,0  
 Pulse Repeat Period Seconds 1,0

### W2487 Channel Information

Channel Name 2487Channel 1  
 Description  
 Use Channels On  
 Wavelength 385  
 Output Mode Absorbance A (Ch1)  
 Data Mode Absorbance A (Ch1)  
 Sampling Rate 1  
 Filter Type Hamming  
 Aups 2,0000  
 Time Constant 1,0  
 AU Offset 0,000  
 Voltage Offset 0  
 Polarity +  
 AutoZero Wavelength True  
 AutoZero Keypad True  
 AutoZeroEvent Input True  
 AutoZero Inject True  
 Chart Mark Enable True  
 Ratio AuMinimum 0,1000  
 Minimum Ratio 0,00  
 Maximum Ratio 2,00

### PCM/15xx Instrument Setup

|                   |          |            |         |
|-------------------|----------|------------|---------|
| Type              | PCM/15xx | Low Limit  | 0,0     |
| Instrument Status | On       | Total Flow | 1,00    |
| Pump Mode         | Gradient | Use Events | On      |
| Flow A            | 0,55     | Solvent A  | 2%HCOOH |
| Flow B            | 0,45     | Solvent B  | MeOH    |
| Flow C            | 0,00     | Solvent C  |         |
| High Limit        | 4000,0   |            |         |

### PCM/15xx Gradient Table

|   | Time | Flow | %A   | %B   | %C  | Curve |
|---|------|------|------|------|-----|-------|
| 1 |      | 1,00 | 55,0 | 45,0 | 0,0 |       |
| 2 | 1,50 | 1,00 | 55,0 | 45,0 | 0,0 | 6     |

|   | Time  | Flow | %A   | %B   | %C  | Curve |
|---|-------|------|------|------|-----|-------|
| 3 | 12,00 | 1,00 | 45,0 | 55,0 | 0,0 | 6     |
| 4 | 15,00 | 1,00 | 45,0 | 55,0 | 0,0 | 6     |



## Multi Sample Summary

Reported by User: System

Project Name: Hrizeni

### PCM/15xx Gradient Table

|   | Time  | Flow | %A   | %B   | %C  | Curve |
|---|-------|------|------|------|-----|-------|
| 5 | 16,00 | 1,00 | 55,0 | 45,0 | 0,0 | 6     |

### Revision History

This method contains 1 items in the revision history.

### Method Version Summaries

|   | Name                | Type       | Comments | Date                | Modified User | Locked | Method Id |
|---|---------------------|------------|----------|---------------------|---------------|--------|-----------|
| 1 | 55 45 385 BDI 17_IM | Instrument |          | 16.11.2010 15:14:58 | System        | No     | 1300      |

### Method Version Summaries

|   | Method Version |
|---|----------------|
| 1 | 1              |

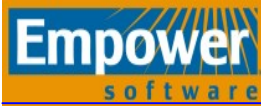

# Multi Sample Summary

Reported by User: System

Project Name: Hrizeni

## SAMPLE INFORMATION

|                   |                             |                     |                     |
|-------------------|-----------------------------|---------------------|---------------------|
| Sample Name:      | 60 40 385 <b>Compound 6</b> | Acquired By:        | System              |
| Sample Type:      | Unknown                     | Date Acquired:      | 17.11.2010 13:35:45 |
| Vial:             | 8                           | Acq. Method Set:    | 60 40 385 BDI 17_MS |
| Injection #:      | 1                           | Date Processed:     | 17.11.2010 15:48:08 |
| Injection Volume: | 10,00 ul                    | Processing Method:  | <b>6</b>            |
| Run Time:         | 14,0 Minutes                | Channel Name:       | 2487Channel 1       |
| Sample Set Name:  |                             | Proc. Chnl. Descr.: |                     |

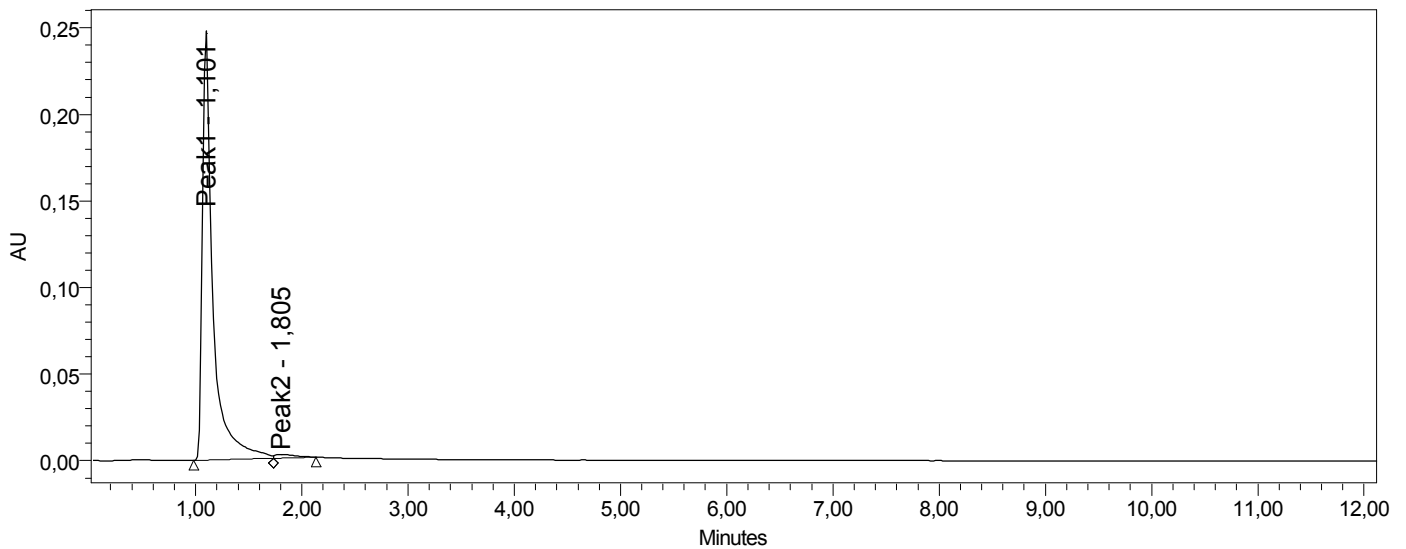

|   | Peak Name | RT    | Area    | % Area | Height |
|---|-----------|-------|---------|--------|--------|
| 1 | Peak1     | 1,101 | 1703103 | 98,43  | 244353 |
| 2 | Peak2     | 1,805 | 27203   | 1,57   | 2213   |



Reported by User: System

Project Name: Hrizeni

## Instrument Method: 60 40 385 BDI 17\_IM

Stored: 16.11.2010 14:47:14

### W2487 Instrument Setup

Type W2487  
 Instrument Status On  
 Dual Wavelength False  
 Pulse Period Seconds 1,0  
 Pulse Repeat Period Seconds 1,0

### W2487 Channel Information

Channel Name 2487Channel 1  
 Description  
 Use Channels On  
 Wavelength 385  
 Output Mode Absorbance A (Ch1)  
 Data Mode Absorbance A (Ch1)  
 Sampling Rate 1  
 Filter Type Hamming  
 Aups 2,0000  
 Time Constant 1,0  
 AU Offset 0,000  
 Voltage Offset 0  
 Polarity +  
 AutoZero Wavelength True  
 AutoZero Keypad True  
 AutoZeroEvent Input True  
 AutoZero Inject True  
 Chart Mark Enable True  
 Ratio AuMinimum 0,1000  
 Minimum Ratio 0,00  
 Maximum Ratio 2,00

### PCM/15xx Instrument Setup

|                   |          |            |         |
|-------------------|----------|------------|---------|
| Type              | PCM/15xx | Low Limit  | 0,0     |
| Instrument Status | On       | Total Flow | 1,00    |
| Pump Mode         | Gradient | Use Events | On      |
| Flow A            | 0,60     | Solvent A  | 2%HCOOH |
| Flow B            | 0,40     | Solvent B  | MeOH    |
| Flow C            | 0,00     | Solvent C  |         |
| High Limit        | 4000,0   |            |         |

### PCM/15xx Gradient Table

|   | Time | Flow | %A   | %B   | %C  | Curve |
|---|------|------|------|------|-----|-------|
| 1 |      | 1,00 | 60,0 | 40,0 | 0,0 |       |
| 2 | 1,50 | 1,00 | 60,0 | 40,0 | 0,0 | 6     |

|   | Time  | Flow | %A   | %B   | %C  | Curve |
|---|-------|------|------|------|-----|-------|
| 3 | 12,00 | 1,00 | 40,0 | 60,0 | 0,0 | 6     |
| 4 | 15,00 | 1,00 | 40,0 | 60,0 | 0,0 | 6     |





## Multi Sample Summary

Reported by User: System

Project Name: Hrizeni

### PCM/15xx Gradient Table

|   | Time  | Flow | %A   | %B   | %C  | Curve |
|---|-------|------|------|------|-----|-------|
| 5 | 16,00 | 1,00 | 60,0 | 40,0 | 0,0 | 6     |

### Revision History

This method contains 1 items in the revision history.

### Method Version Summaries

|   | Name                | Type       | Comments | Date                | Modified User | Locked | Method Id |
|---|---------------------|------------|----------|---------------------|---------------|--------|-----------|
| 1 | 60 40 385 BDI 17_IM | Instrument |          | 16.11.2010 14:47:14 | System        | No     | 1293      |

### Method Version Summaries

|   | Method Version |
|---|----------------|
| 1 | 1              |

Reported by User: System

Project Name: Hrizeni

**SAMPLE INFORMATION**

|                   |                             |                     |                     |
|-------------------|-----------------------------|---------------------|---------------------|
| Sample Name:      | 75 25 385 <b>Compound 1</b> | Acquired By:        | System              |
| Sample Type:      | Unknown                     | Date Acquired:      | 11.11.2010 14:10:45 |
| Vial:             | 6                           | Acq. Method Set:    | 75 25 385 BG11_MS   |
| Injection #:      | 1                           | Date Processed:     | 17.11.2010 15:14:15 |
| Injection Volume: | 10,00 ul                    | Processing Method:  | 1                   |
| Run Time:         | 12,0 Minutes                | Channel Name:       | 2487Channel 1       |
| Sample Set Name:  |                             | Proc. Chnl. Descr.: |                     |

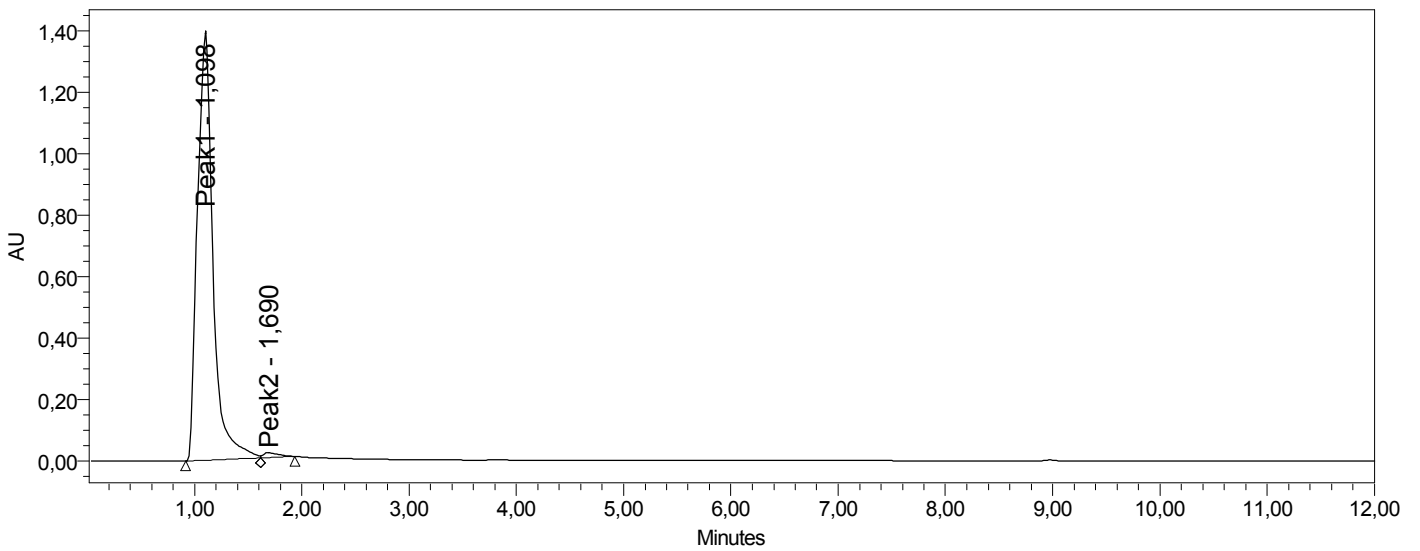

|   | Peak Name | RT    | Area     | % Area | Height  |
|---|-----------|-------|----------|--------|---------|
| 1 | Peak1     | 1,098 | 13999309 | 98,88  | 1393080 |
| 2 | Peak2     | 1,690 | 158155   | 1,12   | 16023   |



Reported by User: System

Project Name: Hrizeni

## Instrument Method: 75 25 385 BG11\_IM

Stored: 11.11.2010 13:50:09

### W2487 Instrument Setup

Type W2487  
 Instrument Status On  
 Dual Wavelength False  
 Pulse Period Seconds 1,0  
 Pulse Repeat Period Seconds 1,0

### W2487 Channel Information

Channel Name 2487Channel 1  
 Description  
 Use Channels On  
 Wavelength 385  
 Output Mode Absorbance A (Ch1)  
 Data Mode Absorbance A (Ch1)  
 Sampling Rate 1  
 Filter Type Hamming  
 Aups 2,0000  
 Time Constant 1,0  
 AU Offset 0,000  
 Voltage Offset 0  
 Polarity +  
 AutoZero Wavelength True  
 AutoZero Keypad True  
 AutoZeroEvent Input True  
 AutoZero Inject True  
 Chart Mark Enable True  
 Ratio AuMinimum 0,1000  
 Minimum Ratio 0,00  
 Maximum Ratio 2,00

### PCM/15xx Instrument Setup

|                   |          |            |         |
|-------------------|----------|------------|---------|
| Type              | PCM/15xx | Low Limit  | 0,0     |
| Instrument Status | On       | Total Flow | 1,00    |
| Pump Mode         | Gradient | Use Events | On      |
| Flow A            | 0,75     | Solvent A  | 2%HCOOH |
| Flow B            | 0,25     | Solvent B  | MeOH    |
| Flow C            | 0,00     | Solvent C  |         |
| High Limit        | 4000,0   |            |         |

### PCM/15xx Gradient Table

|   | Time | Flow | %A   | %B   | %C  | Curve |
|---|------|------|------|------|-----|-------|
| 1 |      | 1,00 | 75,0 | 25,0 | 0,0 |       |
| 2 | 3,00 | 1,00 | 75,0 | 25,0 | 0,0 | 6     |

|   | Time  | Flow | %A   | %B   | %C  | Curve |
|---|-------|------|------|------|-----|-------|
| 3 | 9,00  | 1,00 | 25,0 | 75,0 | 0,0 | 6     |
| 4 | 11,00 | 1,00 | 25,0 | 75,0 | 0,0 | 6     |

Reported by User: System

Project Name: Hrizeni

**PCM/15xx Gradient Table**

|   | Time  | Flow | %A   | %B   | %C  | Curve |
|---|-------|------|------|------|-----|-------|
| 5 | 12,00 | 1,00 | 75,0 | 25,0 | 0,0 | 6     |

Revision History

This method contains 1 items in the revision history.

**Method Version Summaries**

|   | Name              | Type       | Comments | Date                | Modified User | Locked | Method Id |
|---|-------------------|------------|----------|---------------------|---------------|--------|-----------|
| 1 | 75 25 385 BG11_IM | Instrument |          | 11.11.2010 13:50:09 | System        | No     | 1155      |

**Method Version Summaries**

|   | Method Version |
|---|----------------|
| 1 | 1              |

Reported by User: System

Project Name: Hrizeni

**SAMPLE INFORMATION**

|                   |                              |                     |                     |
|-------------------|------------------------------|---------------------|---------------------|
| Sample Name:      | 85 15 360 <b>Compound 15</b> | Acquired By:        | System              |
| Sample Type:      | Unknown                      | Date Acquired:      | 12.11.2010 14:37:44 |
| Vial:             | 5                            | Acq. Method Set:    | 85 15 360 BG15_MS   |
| Injection #:      | 1                            | Date Processed:     | 17.11.2010 15:30:13 |
| Injection Volume: | 10,00 ul                     | Processing Method:  | <b>15</b>           |
| Run Time:         | 13,0 Minutes                 | Channel Name:       | 2487Channel 1       |
| Sample Set Name:  |                              | Proc. Chnl. Descr.: |                     |

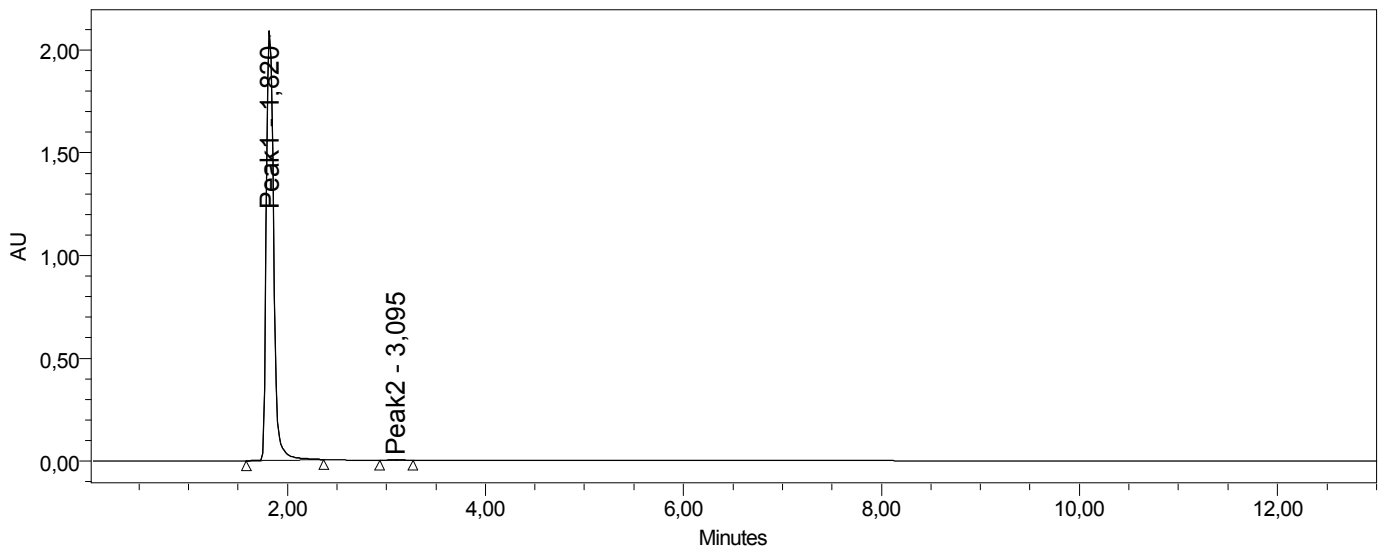

|   | Peak Name | RT    | Area     | % Area | Height  |
|---|-----------|-------|----------|--------|---------|
| 1 | Peak1     | 1,820 | 10798053 | 99,75  | 2107835 |
| 2 | Peak2     | 3,095 | 26682    | 0,25   | 2605    |

Reported by User: System

Project Name: Hrizeni

## Instrument Method: 85 15 360 BG15\_IM

Stored: 12.11.2010 14:03:54

### W2487 Instrument Setup

Type W2487  
 Instrument Status On  
 Dual Wavelength False  
 Pulse Period Seconds 1,0  
 Pulse Repeat Period Seconds 1,0

### W2487 Channel Information

Channel Name 2487Channel 1  
 Description  
 Use Channels On  
 Wavelength 360  
 Output Mode Absorbance A (Ch1)  
 Data Mode Absorbance A (Ch1)  
 Sampling Rate 1  
 Filter Type Hamming  
 Aups 2,0000  
 Time Constant 1,0  
 AU Offset 0,000  
 Voltage Offset 0  
 Polarity +  
 AutoZero Wavelength True  
 AutoZero Keypad True  
 AutoZeroEvent Input True  
 AutoZero Inject True  
 Chart Mark Enable True  
 Ratio AuMinimum 0,1000  
 Minimum Ratio 0,00  
 Maximum Ratio 2,00

### PCM/15xx Instrument Setup

|                   |          |            |         |
|-------------------|----------|------------|---------|
| Type              | PCM/15xx | Low Limit  | 0,0     |
| Instrument Status | On       | Total Flow | 1,00    |
| Pump Mode         | Gradient | Use Events | On      |
| Flow A            | 0,85     | Solvent A  | 2%HCOOH |
| Flow B            | 0,15     | Solvent B  | MeOH    |
| Flow C            | 0,00     | Solvent C  |         |
| High Limit        | 4000,0   |            |         |

### PCM/15xx Gradient Table

|   | Time | Flow | %A   | %B   | %C  | Curve |
|---|------|------|------|------|-----|-------|
| 1 |      | 1,00 | 85,0 | 15,0 | 0,0 |       |
| 2 | 3,00 | 1,00 | 85,0 | 15,0 | 0,0 | 6     |

|   | Time  | Flow | %A   | %B   | %C  | Curve |
|---|-------|------|------|------|-----|-------|
| 3 | 9,00  | 1,00 | 15,0 | 85,0 | 0,0 | 6     |
| 4 | 12,00 | 1,00 | 15,0 | 85,0 | 0,0 | 6     |



Reported by User: System

Project Name: Hrizeni

**PCM/15xx Gradient Table**

|   | Time  | Flow | %A   | %B   | %C  | Curve |
|---|-------|------|------|------|-----|-------|
| 5 | 13,00 | 1,00 | 85,0 | 15,0 | 0,0 | 6     |

Revision History

This method contains 1 items in the revision history.

**Method Version Summaries**

|   | Name              | Type       | Comments | Date                | Modified User | Locked | Method Id |
|---|-------------------|------------|----------|---------------------|---------------|--------|-----------|
| 1 | 85 15 360 BG15_IM | Instrument |          | 12.11.2010 14:03:54 | System        | No     | 1213      |

**Method  
Version  
Summaries**

|   | Method Version |
|---|----------------|
| 1 | 1              |

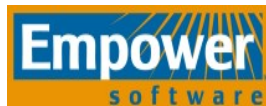

# Multi Sample Summary

Reported by User: System

Project Name: Hrizeni

## SAMPLE INFORMATION

|                   |                              |                     |                     |
|-------------------|------------------------------|---------------------|---------------------|
| Sample Name:      | 60 40 385 <b>Compound 14</b> | Acquired By:        | System              |
| Sample Type:      | Unknown                      | Date Acquired:      | 17.11.2010 13:50:36 |
| Vial:             | 9                            | Acq. Method Set:    | 60 40 385 BDI 17_MS |
| Injection #:      | 1                            | Date Processed:     | 17.11.2010 15:49:43 |
| Injection Volume: | 10,00 ul                     | Processing Method:  | <b>14</b>           |
| Run Time:         | 14,0 Minutes                 | Channel Name:       | 2487Channel 1       |
| Sample Set Name:  |                              | Proc. Chnl. Descr.: |                     |

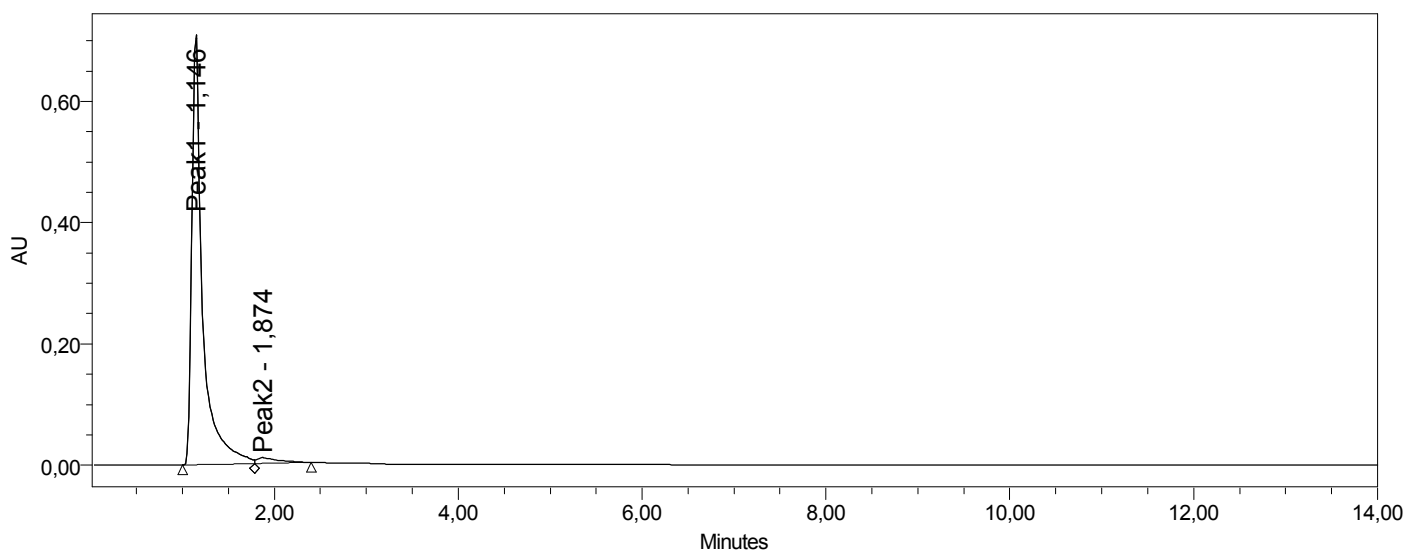

|   | Peak Name | RT    | Area    | % Area | Height |
|---|-----------|-------|---------|--------|--------|
| 1 | Peak1     | 1,146 | 5760099 | 97,40  | 703490 |
| 2 | Peak2     | 1,874 | 153713  | 2,60   | 9566   |





Reported by User: System

Project Name: Hrizeni

## Instrument Method: 60 40 385 BDI 17\_IM

Stored: 16.11.2010 14:47:14

### W2487 Instrument Setup

Type W2487  
 Instrument Status On  
 Dual Wavelength False  
 Pulse Period Seconds 1,0  
 Pulse Repeat Period Seconds 1,0

### W2487 Channel Information

Channel Name 2487Channel 1  
 Description  
 Use Channels On  
 Wavelength 385  
 Output Mode Absorbance A (Ch1)  
 Data Mode Absorbance A (Ch1)  
 Sampling Rate 1  
 Filter Type Hamming  
 Aups 2,0000  
 Time Constant 1,0  
 AU Offset 0,000  
 Voltage Offset 0  
 Polarity +  
 AutoZero Wavelength True  
 AutoZero Keypad True  
 AutoZeroEvent Input True  
 AutoZero Inject True  
 Chart Mark Enable True  
 Ratio AuMinimum 0,1000  
 Minimum Ratio 0,00  
 Maximum Ratio 2,00

### PCM/15xx Instrument Setup

|                   |          |            |         |
|-------------------|----------|------------|---------|
| Type              | PCM/15xx | Low Limit  | 0,0     |
| Instrument Status | On       | Total Flow | 1,00    |
| Pump Mode         | Gradient | Use Events | On      |
| Flow A            | 0,60     | Solvent A  | 2%HCOOH |
| Flow B            | 0,40     | Solvent B  | MeOH    |
| Flow C            | 0,00     | Solvent C  |         |
| High Limit        | 4000,0   |            |         |

### PCM/15xx Gradient Table

|   | Time | Flow | %A   | %B   | %C  | Curve |
|---|------|------|------|------|-----|-------|
| 1 |      | 1,00 | 60,0 | 40,0 | 0,0 |       |
| 2 | 1,50 | 1,00 | 60,0 | 40,0 | 0,0 | 6     |

|   | Time  | Flow | %A   | %B   | %C  | Curve |
|---|-------|------|------|------|-----|-------|
| 3 | 12,00 | 1,00 | 40,0 | 60,0 | 0,0 | 6     |
| 4 | 15,00 | 1,00 | 40,0 | 60,0 | 0,0 | 6     |



## Multi Sample Summary

Reported by User: System

Project Name: Hrizeni

### PCM/15xx Gradient Table

|   | Time  | Flow | %A   | %B   | %C  | Curve |
|---|-------|------|------|------|-----|-------|
| 5 | 16,00 | 1,00 | 60,0 | 40,0 | 0,0 | 6     |

### Revision History

This method contains 1 items in the revision history.

### Method Version Summaries

|   | Name                | Type       | Comments | Date                | Modified User | Locked | Method Id |
|---|---------------------|------------|----------|---------------------|---------------|--------|-----------|
| 1 | 60 40 385 BDI 17_IM | Instrument |          | 16.11.2010 14:47:14 | System        | No     | 1293      |

### Method Version Summaries

|   | Method Version |
|---|----------------|
| 1 | 1              |

Reported by User: System

Project Name: Hrizeni

### SAMPLE INFORMATION

|                                           |                                     |
|-------------------------------------------|-------------------------------------|
| Sample Name: 90 10 385 <b>Compound 11</b> | Acquired By: System                 |
| Sample Type: Unknown                      | Date Acquired: 15.11.2010 13:56:35  |
| Vial: 5                                   | Acq. Method Set: 90 10 385 BG17_MS  |
| Injection #: 1                            | Date Processed: 17.11.2010 15:32:34 |
| Injection Volume: 10,00 ul                | Processing Method: <b>11</b>        |
| Run Time: 13,0 Minutes                    | Channel Name: 2487Channel 1         |
| Sample Set Name:                          | Proc. Chnl. Descr.:                 |

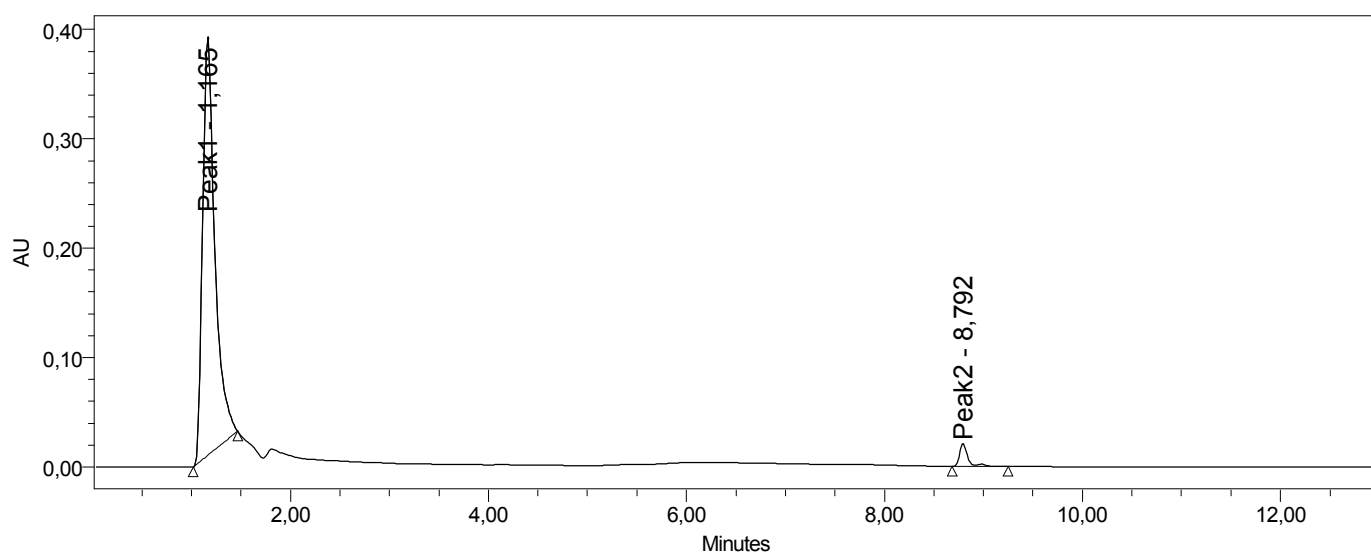

|   | Peak Name | RT    | Area    | % Area | Height |
|---|-----------|-------|---------|--------|--------|
| 1 | Peak1     | 1,165 | 3311131 | 96,50  | 380532 |
| 2 | Peak2     | 8,792 | 120028  | 3,50   | 20674  |



Reported by User: System

Project Name: Hrizeni

## Instrument Method: 90 10 385 BG17\_IM

Stored: 15.11.2010 13:26:34

### W2487 Instrument Setup

Type W2487  
 Instrument Status On  
 Dual Wavelength False  
 Pulse Period Seconds 1,0  
 Pulse Repeat Period Seconds 1,0

### W2487 Channel Information

Channel Name 2487Channel 1  
 Description  
 Use Channels On  
 Wavelength 385  
 Output Mode Absorbance A (Ch1)  
 Data Mode Absorbance A (Ch1)  
 Sampling Rate 1  
 Filter Type Hamming  
 Aups 2,0000  
 Time Constant 1,0  
 AU Offset 0,000  
 Voltage Offset 0  
 Polarity +  
 AutoZero Wavelength True  
 AutoZero Keypad True  
 AutoZeroEvent Input True  
 AutoZero Inject True  
 Chart Mark Enable True  
 Ratio AuMinimum 0,1000  
 Minimum Ratio 0,00  
 Maximum Ratio 2,00

### PCM/15xx Instrument Setup

|                   |          |            |         |
|-------------------|----------|------------|---------|
| Type              | PCM/15xx | Low Limit  | 0,0     |
| Instrument Status | On       | Total Flow | 1,00    |
| Pump Mode         | Gradient | Use Events | On      |
| Flow A            | 0,90     | Solvent A  | 2%HCOOH |
| Flow B            | 0,10     | Solvent B  | MeOH    |
| Flow C            | 0,00     | Solvent C  |         |
| High Limit        | 4000,0   |            |         |

### PCM/15xx Gradient Table

|   | Time | Flow | %A   | %B   | %C  | Curve |
|---|------|------|------|------|-----|-------|
| 1 |      | 1,00 | 90,0 | 10,0 | 0,0 |       |
| 2 | 3,00 | 1,00 | 90,0 | 10,0 | 0,0 | 6     |

|   | Time  | Flow | %A   | %B   | %C  | Curve |
|---|-------|------|------|------|-----|-------|
| 3 | 9,00  | 1,00 | 10,0 | 90,0 | 0,0 | 6     |
| 4 | 11,00 | 1,00 | 10,0 | 90,0 | 0,0 | 6     |



## Multi Sample Summary

Reported by User: System

Project Name: Hrizeni

### PCM/15xx Gradient Table

|   | Time  | Flow | %A   | %B   | %C  | Curve |
|---|-------|------|------|------|-----|-------|
| 5 | 12,00 | 1,00 | 90,0 | 10,0 | 0,0 | 6     |

### Revision History

This method contains 1 items in the revision history.

### Method Version Summaries

|   | Name              | Type       | Comments | Date                | Modified User | Locked | Method Id |
|---|-------------------|------------|----------|---------------------|---------------|--------|-----------|
| 1 | 90 10 385 BG17_IM | Instrument |          | 15.11.2010 13:26:34 | System        | No     | 1236      |

### Method Version Summaries

|   | Method Version |
|---|----------------|
| 1 | 1              |



# Multi Sample Summary

Reported by User: System

Project Name: Hrizeni

## SAMPLE INFORMATION

|                   |                              |                     |                     |
|-------------------|------------------------------|---------------------|---------------------|
| Sample Name:      | 80 20 385 <b>Compound 10</b> | Acquired By:        | System              |
| Sample Type:      | Unknown                      | Date Acquired:      | 16.11.2010 10:27:11 |
| Vial:             | 1                            | Acq. Method Set:    | 80 20 385 BG11_MS   |
| Injection #:      | 1                            | Date Processed:     | 17.11.2010 15:36:54 |
| Injection Volume: | 10,00 ul                     | Processing Method:  | <b>10</b>           |
| Run Time:         | 13,0 Minutes                 | Channel Name:       | 2487Channel 1       |
| Sample Set Name:  |                              | Proc. Chnl. Descr.: |                     |

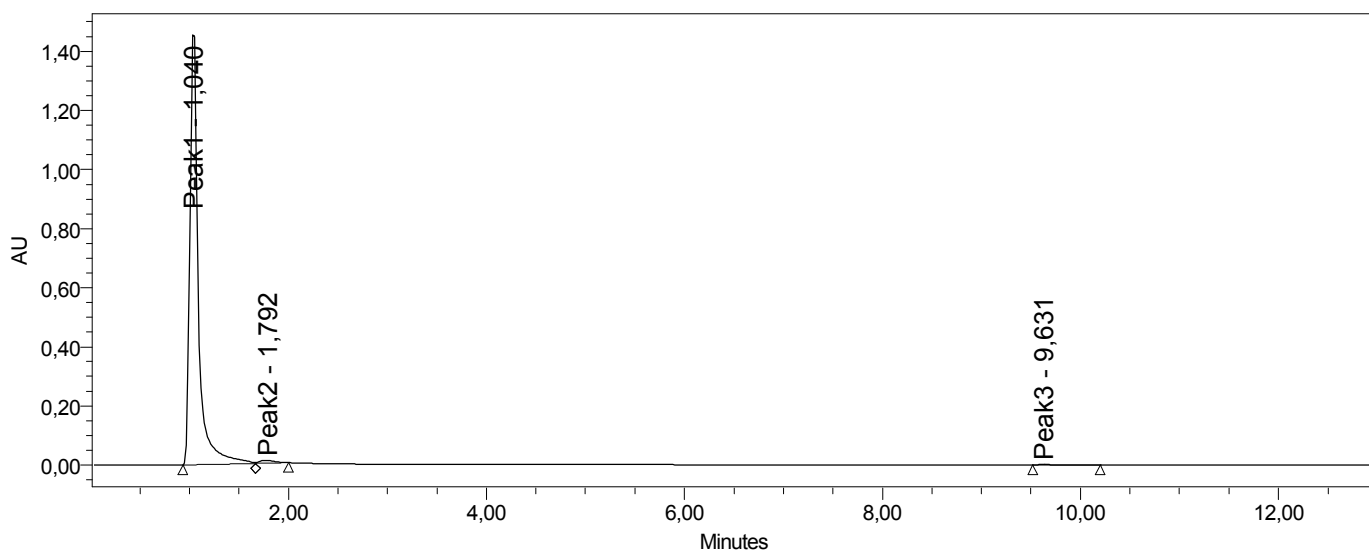

|   | Peak Name | RT    | Area    | % Area | Height  |
|---|-----------|-------|---------|--------|---------|
| 1 | Peak1     | 1,040 | 8831324 | 98,66  | 1462575 |
| 2 | Peak2     | 1,792 | 99387   | 1,11   | 8790    |
| 3 | Peak3     | 9,631 | 20324   | 0,23   | 2867    |



Reported by User: System

Project Name: Hrizeni

## Instrument Method: 80 20 385 BG11\_IM

Stored: 11.11.2010 11:21:36

### W2487 Instrument Setup

Type W2487  
 Instrument Status On  
 Dual Wavelength False  
 Pulse Period Seconds 1,0  
 Pulse Repeat Period Seconds 1,0

### W2487 Channel Information

Channel Name 2487Channel 1  
 Description  
 Use Channels On  
 Wavelength 385  
 Output Mode Absorbance A (Ch1)  
 Data Mode Absorbance A (Ch1)  
 Sampling Rate 1  
 Filter Type Hamming  
 Aups 2,0000  
 Time Constant 1,0  
 AU Offset 0,000  
 Voltage Offset 0  
 Polarity +  
 AutoZero Wavelength True  
 AutoZero Keypad True  
 AutoZeroEvent Input True  
 AutoZero Inject True  
 Chart Mark Enable True  
 Ratio AuMinimum 0,1000  
 Minimum Ratio 0,00  
 Maximum Ratio 2,00

### PCM/15xx Instrument Setup

|                   |          |            |         |
|-------------------|----------|------------|---------|
| Type              | PCM/15xx | Low Limit  | 0,0     |
| Instrument Status | On       | Total Flow | 1,00    |
| Pump Mode         | Gradient | Use Events | On      |
| Flow A            | 0,80     | Solvent A  | 2%HCOOH |
| Flow B            | 0,20     | Solvent B  | MeOH    |
| Flow C            | 0,00     | Solvent C  |         |
| High Limit        | 4000,0   |            |         |

### PCM/15xx Gradient Table

|   | Time | Flow | %A   | %B   | %C  | Curve |
|---|------|------|------|------|-----|-------|
| 1 |      | 1,00 | 80,0 | 20,0 | 0,0 |       |
| 2 | 1,50 | 1,00 | 80,0 | 20,0 | 0,0 | 6     |

|   | Time  | Flow | %A   | %B   | %C  | Curve |
|---|-------|------|------|------|-----|-------|
| 3 | 12,00 | 1,00 | 20,0 | 80,0 | 0,0 | 6     |
| 4 | 15,00 | 1,00 | 20,0 | 80,0 | 0,0 | 6     |



## Multi Sample Summary

Reported by User: System

Project Name: Hrizeni

### PCM/15xx Gradient Table

|   | Time  | Flow | %A   | %B   | %C  | Curve |
|---|-------|------|------|------|-----|-------|
| 5 | 16,00 | 1,00 | 80,0 | 20,0 | 0,0 | 6     |

### Revision History

This method contains 1 items in the revision history.

### Method Version Summaries

|   | Name              | Type       | Comments | Date                | Modified User | Locked | Method Id |
|---|-------------------|------------|----------|---------------------|---------------|--------|-----------|
| 1 | 80 20 385 BG11_IM | Instrument |          | 11.11.2010 11:21:36 | System        | No     | 1145      |

### Method Version Summaries

|   | Method Version |
|---|----------------|
| 1 | 1              |





# Multi Sample Summary

Reported by User: System

Project Name: Hrizeni

## SAMPLE INFORMATION

|                   |                             |                     |                     |
|-------------------|-----------------------------|---------------------|---------------------|
| Sample Name:      | 60 40 385 <b>Compound 8</b> | Acquired By:        | System              |
| Sample Type:      | Unknown                     | Date Acquired:      | 17.11.2010 12:56:22 |
| Vial:             | 6                           | Acq. Method Set:    | 60 40 385 BDI 17_MS |
| Injection #:      | 1                           | Date Processed:     | 17.11.2010 15:45:02 |
| Injection Volume: | 10,00 ul                    | Processing Method:  | <b>8</b>            |
| Run Time:         | 15,0 Minutes                | Channel Name:       | 2487Channel 1       |
| Sample Set Name:  |                             | Proc. Chnl. Descr.: |                     |

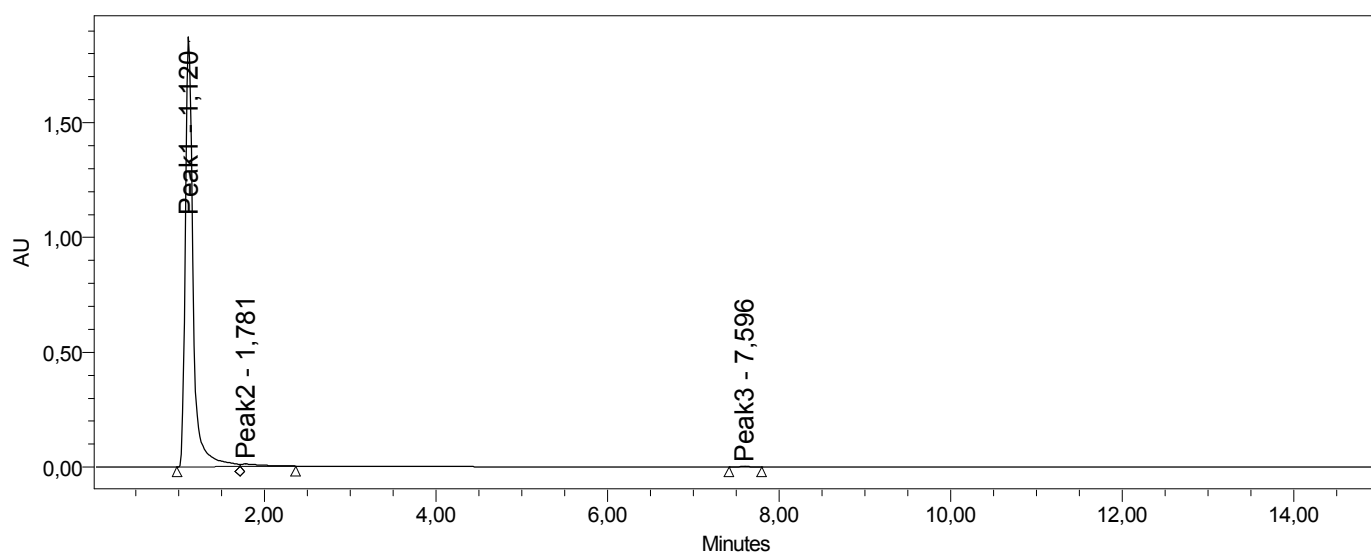

|   | Peak Name | RT    | Area     | % Area | Height  |
|---|-----------|-------|----------|--------|---------|
| 1 | Peak1     | 1,120 | 12039151 | 98,39  | 1868506 |
| 2 | Peak2     | 1,781 | 180104   | 1,47   | 11421   |
| 3 | Peak3     | 7,596 | 16947    | 0,14   | 1788    |



Reported by User: System

Project Name: Hrizeni

## Instrument Method: 60 40 385 BDI 17\_IM

Stored: 16.11.2010 14:47:14

### W2487 Instrument Setup

Type W2487  
 Instrument Status On  
 Dual Wavelength False  
 Pulse Period Seconds 1,0  
 Pulse Repeat Period Seconds 1,0

### W2487 Channel Information

Channel Name 2487Channel 1  
 Description  
 Use Channels On  
 Wavelength 385  
 Output Mode Absorbance A (Ch1)  
 Data Mode Absorbance A (Ch1)  
 Sampling Rate 1  
 Filter Type Hamming  
 Aups 2,0000  
 Time Constant 1,0  
 AU Offset 0,000  
 Voltage Offset 0  
 Polarity +  
 AutoZero Wavelength True  
 AutoZero Keypad True  
 AutoZeroEvent Input True  
 AutoZero Inject True  
 Chart Mark Enable True  
 Ratio AuMinimum 0,1000  
 Minimum Ratio 0,00  
 Maximum Ratio 2,00

### PCM/15xx Instrument Setup

|                   |          |            |         |
|-------------------|----------|------------|---------|
| Type              | PCM/15xx | Low Limit  | 0,0     |
| Instrument Status | On       | Total Flow | 1,00    |
| Pump Mode         | Gradient | Use Events | On      |
| Flow A            | 0,60     | Solvent A  | 2%HCOOH |
| Flow B            | 0,40     | Solvent B  | MeOH    |
| Flow C            | 0,00     | Solvent C  |         |
| High Limit        | 4000,0   |            |         |

### PCM/15xx Gradient Table

|   | Time | Flow | %A   | %B   | %C  | Curve |
|---|------|------|------|------|-----|-------|
| 1 |      | 1,00 | 60,0 | 40,0 | 0,0 |       |
| 2 | 1,50 | 1,00 | 60,0 | 40,0 | 0,0 | 6     |

|   | Time  | Flow | %A   | %B   | %C  | Curve |
|---|-------|------|------|------|-----|-------|
| 3 | 12,00 | 1,00 | 40,0 | 60,0 | 0,0 | 6     |
| 4 | 15,00 | 1,00 | 40,0 | 60,0 | 0,0 | 6     |



## Multi Sample Summary

Reported by User: System

Project Name: Hrizeni

### PCM/15xx Gradient Table

|   | Time  | Flow | %A   | %B   | %C  | Curve |
|---|-------|------|------|------|-----|-------|
| 5 | 16,00 | 1,00 | 60,0 | 40,0 | 0,0 | 6     |

### Revision History

This method contains 1 items in the revision history.

### Method Version Summaries

|   | Name                | Type       | Comments | Date                | Modified User | Locked | Method Id |
|---|---------------------|------------|----------|---------------------|---------------|--------|-----------|
| 1 | 60 40 385 BDI 17_IM | Instrument |          | 16.11.2010 14:47:14 | System        | No     | 1293      |

### Method Version Summaries

|   | Method Version |
|---|----------------|
| 1 | 1              |



# Multi Sample Summary

Reported by User: System

Project Name: Hrizeni

## SAMPLE INFORMATION

|                   |                          |                     |                         |
|-------------------|--------------------------|---------------------|-------------------------|
| Sample Name:      | 363 nm <b>Compound 9</b> | Acquired By:        | System                  |
| Sample Type:      | Unknown                  | Date Acquired:      | 9.11.2010 13:50:13      |
| Vial:             | 1                        | Acq. Method Set:    | cistoca hrizeni90 10_MS |
| Injection #:      | 1                        | Date Processed:     | 17.11.2010 15:11:12     |
| Injection Volume: | 10,00 ul                 | Processing Method:  | <b>9</b>                |
| Run Time:         | 25,0 Minutes             | Channel Name:       | 2487Channel 1           |
| Sample Set Name:  |                          | Proc. Chnl. Descr.: |                         |

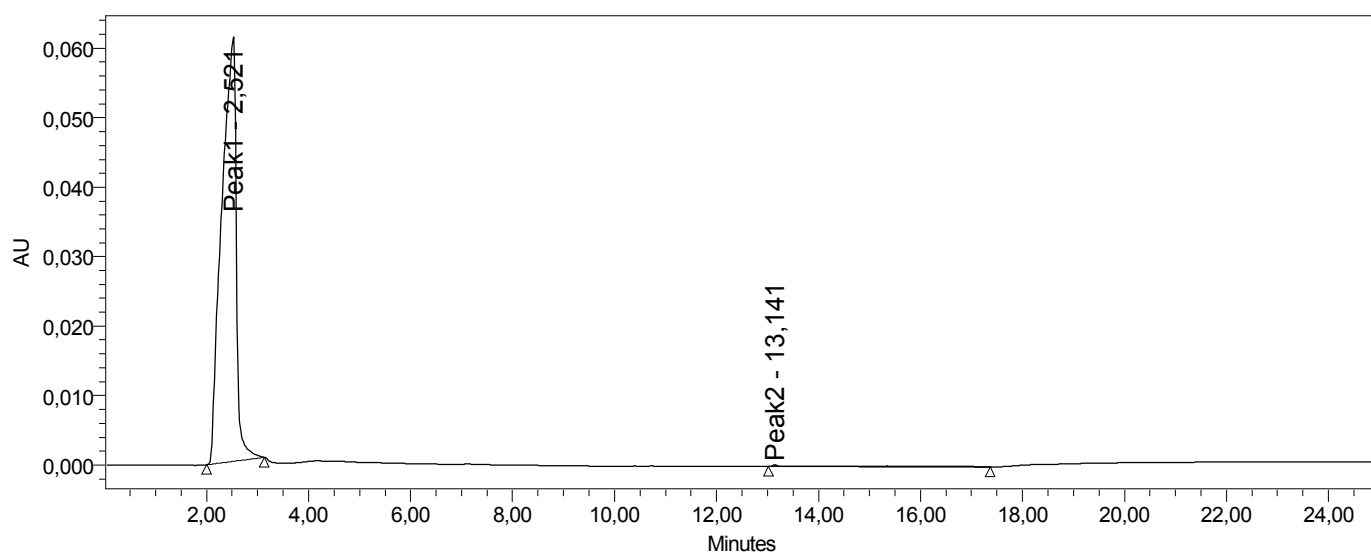

|   | Peak Name | RT     | Area    | % Area | Height |
|---|-----------|--------|---------|--------|--------|
| 1 | Peak1     | 2,521  | 1217818 | 98,68  | 62038  |
| 2 | Peak2     | 13,141 | 16280   | 1,32   | 199    |



Reported by User: System

Project Name: Hrizeni

## Instrument Method: cistoca hrizeni90 10\_IM

Stored: 9.11.2010 13:17:11

### W2487 Instrument Setup

Type W2487  
 Instrument Status On  
 Dual Wavelength False  
 Pulse Period Seconds 1,0  
 Pulse Repeat Period Seconds 1,0

### W2487 Channel Information

Channel Name 2487Channel 1  
 Description  
 Use Channels On  
 Wavelength 360  
 Output Mode Absorbance A (Ch1)  
 Data Mode Absorbance A (Ch1)  
 Sampling Rate 1  
 Filter Type Hamming  
 Aups 2,0000  
 Time Constant 1,0  
 AU Offset 0,000  
 Voltage Offset 0  
 Polarity +  
 AutoZero Wavelength True  
 AutoZero Keypad True  
 AutoZeroEvent Input True  
 AutoZero Inject True  
 Chart Mark Enable True  
 Ratio AuMinimum 0,1000  
 Minimum Ratio 0,00  
 Maximum Ratio 2,00

### PCM/15xx Instrument Setup

|                   |          |            |           |
|-------------------|----------|------------|-----------|
| Type              | PCM/15xx | Low Limit  | 0,0       |
| Instrument Status | On       | Total Flow | 1,00      |
| Pump Mode         | Gradient | Use Events | On        |
| Flow A            | 0,90     | Solvent A  | 0.2%HCOOH |
| Flow B            | 0,10     | Solvent B  | Metanol   |
| Flow C            | 0,00     | Solvent C  |           |
| High Limit        | 4000,0   |            |           |

### PCM/15xx Gradient Table

|   | Time | Flow | %A   | %B   | %C  | Curve |
|---|------|------|------|------|-----|-------|
| 1 |      | 1,00 | 90,0 | 10,0 | 0,0 |       |
| 2 | 1,50 | 1,00 | 90,0 | 10,0 | 0,0 | 6     |

|   | Time  | Flow | %A   | %B   | %C  | Curve |
|---|-------|------|------|------|-----|-------|
| 3 | 12,00 | 1,00 | 10,0 | 90,0 | 0,0 | 6     |
| 4 | 15,00 | 1,00 | 10,0 | 90,0 | 0,0 | 6     |

# Multi Sample Summary

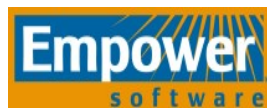

Reported by User: System

Project Name: Hrizeni

### PCM/15xx Gradient Table

|   | Time  | Flow | %A   | %B   | %C  | Curve |
|---|-------|------|------|------|-----|-------|
| 5 | 16,00 | 1,00 | 90,0 | 10,0 | 0,0 | 6     |

### Revision History

This method contains 1 items in the revision history.

### Method Version Summaries

|   | Name                    | Type       | Comments | Date               | Modified User | Locked | Method Id |
|---|-------------------------|------------|----------|--------------------|---------------|--------|-----------|
| 1 | cistoca hrizeni90 10_IM | Instrument |          | 9.11.2010 13:17:11 | System        | No     | 1073      |

### Method Version Summaries

|   | Method Version |
|---|----------------|
| 1 | 1              |



# Multi Sample Summary

Reported by User: System

Project Name: Hrizeni

## SAMPLE INFORMATION

|                   |                             |                     |                     |
|-------------------|-----------------------------|---------------------|---------------------|
| Sample Name:      | 60 40 385 <b>Compound 7</b> | Acquired By:        | System              |
| Sample Type:      | Unknown                     | Date Acquired:      | 18.11.2010 13:23:19 |
| Vial:             | 4                           | Acq. Method Set:    | 60 40 385 BDI 17_MS |
| Injection #:      | 1                           | Date Processed:     | 18.11.2010 13:39:53 |
| Injection Volume: | 10,00 ul                    | Processing Method:  | <b>7</b>            |
| Run Time:         | 15,0 Minutes                | Channel Name:       | 2487Channel 1       |
| Sample Set Name:  |                             | Proc. Chnl. Descr.: |                     |

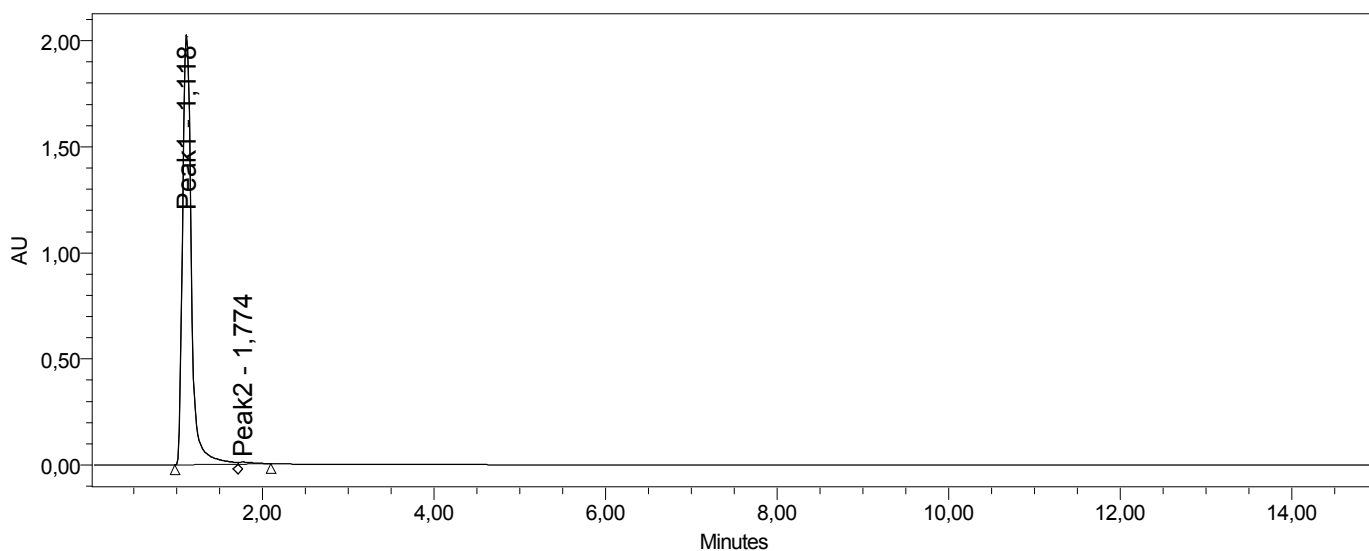

|   | Peak Name | RT    | Area     | % Area | Height  |
|---|-----------|-------|----------|--------|---------|
| 1 | Peak1     | 1,118 | 14643983 | 99,28  | 2035861 |
| 2 | Peak2     | 1,774 | 105772   | 0,72   | 9450    |



Reported by User: System

Project Name: Hrizeni

## Instrument Method: 60 40 385 BDI 17\_IM

Stored: 16.11.2010 14:47:14

### W2487 Instrument Setup

Type W2487  
 Instrument Status On  
 Dual Wavelength False  
 Pulse Period Seconds 1,0  
 Pulse Repeat Period Seconds 1,0

### W2487 Channel Information

Channel Name 2487Channel 1  
 Description  
 Use Channels On  
 Wavelength 385  
 Output Mode Absorbance A (Ch1)  
 Data Mode Absorbance A (Ch1)  
 Sampling Rate 1  
 Filter Type Hamming  
 Aups 2,0000  
 Time Constant 1,0  
 AU Offset 0,000  
 Voltage Offset 0  
 Polarity +  
 AutoZero Wavelength True  
 AutoZero Keypad True  
 AutoZeroEvent Input True  
 AutoZero Inject True  
 Chart Mark Enable True  
 Ratio AuMinimum 0,1000  
 Minimum Ratio 0,00  
 Maximum Ratio 2,00

### PCM/15xx Instrument Setup

|                   |          |            |         |
|-------------------|----------|------------|---------|
| Type              | PCM/15xx | Low Limit  | 0,0     |
| Instrument Status | On       | Total Flow | 1,00    |
| Pump Mode         | Gradient | Use Events | On      |
| Flow A            | 0,60     | Solvent A  | 2%HCOOH |
| Flow B            | 0,40     | Solvent B  | MeOH    |
| Flow C            | 0,00     | Solvent C  |         |
| High Limit        | 4000,0   |            |         |

### PCM/15xx Gradient Table

|   | Time | Flow | %A   | %B   | %C  | Curve |
|---|------|------|------|------|-----|-------|
| 1 |      | 1,00 | 60,0 | 40,0 | 0,0 |       |
| 2 | 1,50 | 1,00 | 60,0 | 40,0 | 0,0 | 6     |

|   | Time  | Flow | %A   | %B   | %C  | Curve |
|---|-------|------|------|------|-----|-------|
| 3 | 12,00 | 1,00 | 40,0 | 60,0 | 0,0 | 6     |
| 4 | 15,00 | 1,00 | 40,0 | 60,0 | 0,0 | 6     |





## Multi Sample Summary

Reported by User: System

Project Name: Hrizeni

### PCM/15xx Gradient Table

|   | Time  | Flow | %A   | %B   | %C  | Curve |
|---|-------|------|------|------|-----|-------|
| 5 | 16,00 | 1,00 | 60,0 | 40,0 | 0,0 | 6     |

### Revision History

This method contains 1 items in the revision history.

### Method Version Summaries

|   | Name                | Type       | Comments | Date                | Modified User | Locked | Method Id |
|---|---------------------|------------|----------|---------------------|---------------|--------|-----------|
| 1 | 60 40 385 BDI 17_IM | Instrument |          | 16.11.2010 14:47:14 | System        | No     | 1293      |

### Method Version Summaries

|   | Method Version |
|---|----------------|
| 1 | 1              |



# Multi Sample Summary

Reported by User: System

Project Name: Hrizeni

## SAMPLE INFORMATION

|                   |                              |                     |                     |
|-------------------|------------------------------|---------------------|---------------------|
| Sample Name:      | 60 40 385 <b>Compound 12</b> | Acquired By:        | System              |
| Sample Type:      | Unknown                      | Date Acquired:      | 19.11.2010 10:48:41 |
| Vial:             | 2                            | Acq. Method Set:    | 60 40 385 BDI 17_MS |
| Injection #:      | 1                            | Date Processed:     | 19.11.2010 11:05:21 |
| Injection Volume: | 10,00 ul                     | Processing Method:  | <b>12</b>           |
| Run Time:         | 15,0 Minutes                 | Channel Name:       | 2487Channel 1       |
| Sample Set Name:  |                              | Proc. Chnl. Descr.: |                     |

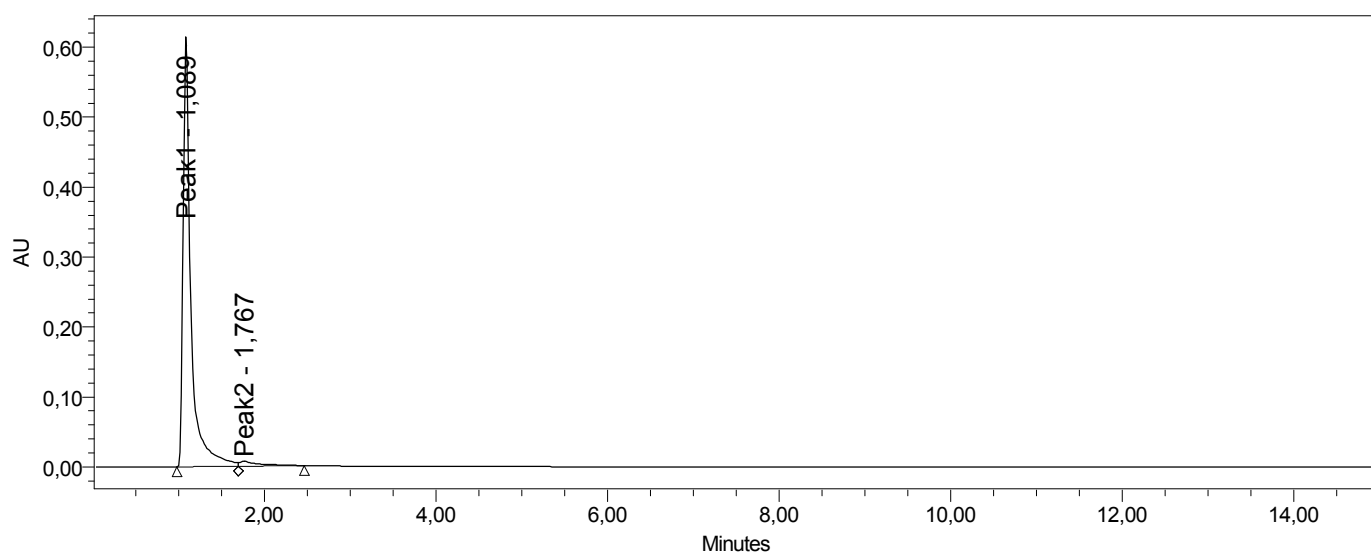

|   | Peak Name | RT    | Area    | % Area | Height |
|---|-----------|-------|---------|--------|--------|
| 1 | Peak1     | 1,089 | 3934623 | 97,26  | 609111 |
| 2 | Peak2     | 1,767 | 111043  | 2,74   | 7129   |



Reported by User: System

Project Name: Hrizeni

## Instrument Method: 60 40 385 BDI 17\_IM

Stored: 16.11.2010 14:47:14

### W2487 Instrument Setup

Type W2487  
 Instrument Status On  
 Dual Wavelength False  
 Pulse Period Seconds 1,0  
 Pulse Repeat Period Seconds 1,0

### W2487 Channel Information

Channel Name 2487Channel 1  
 Description  
 Use Channels On  
 Wavelength 385  
 Output Mode Absorbance A (Ch1)  
 Data Mode Absorbance A (Ch1)  
 Sampling Rate 1  
 Filter Type Hamming  
 Aups 2,0000  
 Time Constant 1,0  
 AU Offset 0,000  
 Voltage Offset 0  
 Polarity +  
 AutoZero Wavelength True  
 AutoZero Keypad True  
 AutoZeroEvent Input True  
 AutoZero Inject True  
 Chart Mark Enable True  
 Ratio AuMinimum 0,1000  
 Minimum Ratio 0,00  
 Maximum Ratio 2,00

### PCM/15xx Instrument Setup

|                   |          |            |         |
|-------------------|----------|------------|---------|
| Type              | PCM/15xx | Low Limit  | 0,0     |
| Instrument Status | On       | Total Flow | 1,00    |
| Pump Mode         | Gradient | Use Events | On      |
| Flow A            | 0,60     | Solvent A  | 2%HCOOH |
| Flow B            | 0,40     | Solvent B  | MeOH    |
| Flow C            | 0,00     | Solvent C  |         |
| High Limit        | 4000,0   |            |         |

### PCM/15xx Gradient Table

|   | Time | Flow | %A   | %B   | %C  | Curve |
|---|------|------|------|------|-----|-------|
| 1 |      | 1,00 | 60,0 | 40,0 | 0,0 |       |
| 2 | 1,50 | 1,00 | 60,0 | 40,0 | 0,0 | 6     |

|   | Time  | Flow | %A   | %B   | %C  | Curve |
|---|-------|------|------|------|-----|-------|
| 3 | 12,00 | 1,00 | 40,0 | 60,0 | 0,0 | 6     |
| 4 | 15,00 | 1,00 | 40,0 | 60,0 | 0,0 | 6     |



## Multi Sample Summary

Reported by User: System

Project Name: Hrizeni

### PCM/15xx Gradient Table

|   | Time  | Flow | %A   | %B   | %C  | Curve |
|---|-------|------|------|------|-----|-------|
| 5 | 16,00 | 1,00 | 60,0 | 40,0 | 0,0 | 6     |

### Revision History

This method contains 1 items in the revision history.

### Method Version Summaries

|   | Name                | Type       | Comments | Date                | Modified User | Locked | Method Id |
|---|---------------------|------------|----------|---------------------|---------------|--------|-----------|
| 1 | 60 40 385 BDI 17_IM | Instrument |          | 16.11.2010 14:47:14 | System        | No     | 1293      |

### Method Version Summaries

|   | Method Version |
|---|----------------|
| 1 | 1              |
